# Supplementary material for: A transposable element insertion is associated with an alternative life history strategy
Source: PubMed Central journal article supplement (PMC6917731; doi:10.1038/s41467-019-13596-2), 2019-12-17
Supplement: 41467_2019_13596_MOESM4_ESM.pdf [file 41467_2019_13596_MOESM4_ESM.pdf]

## **Description of Additional Supplementary Files**

File Name: Supplementary Data 1

Description: Gene set enrichment analysis results from topGO for genes upregulated in Alba abdomens

File Name: Supplementary Data 2

Description: Gene set enrichment analysis results from topGO for genes downregulated in Alba abdomens

File Name: Supplementary Data 3

Description: Gene set enrichment analysis results from topGO for genes downregulated in Alba wings

File Name: Supplementary Data 4

Description: Gene set enrichment analysis results from topGO for genes upregulated in Alba wings

File Name: Supplementary Data 5

Description: Transcriptome GO term annotation results from EggNOG
